# Supplementary material for: Generative modeling for RNA splicing prediction and design
Source: eLife journal article supplement (doi:10.7554/elife.106043), 2025-03-20

## ACIN1 RT-PCR

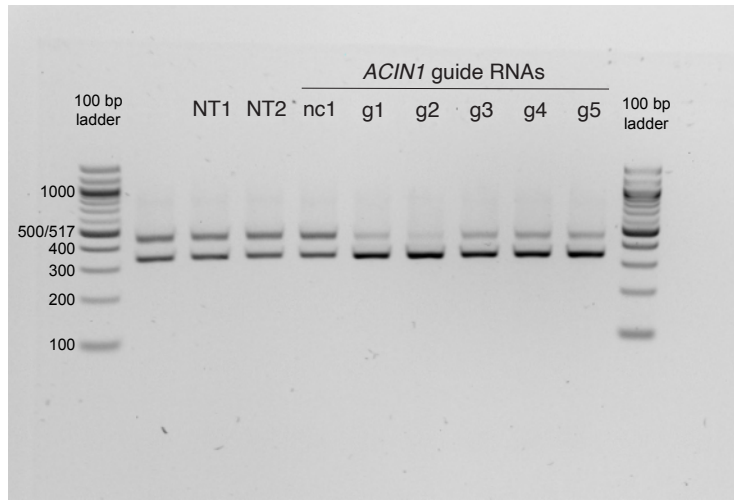

## PTK2 RT-PCR

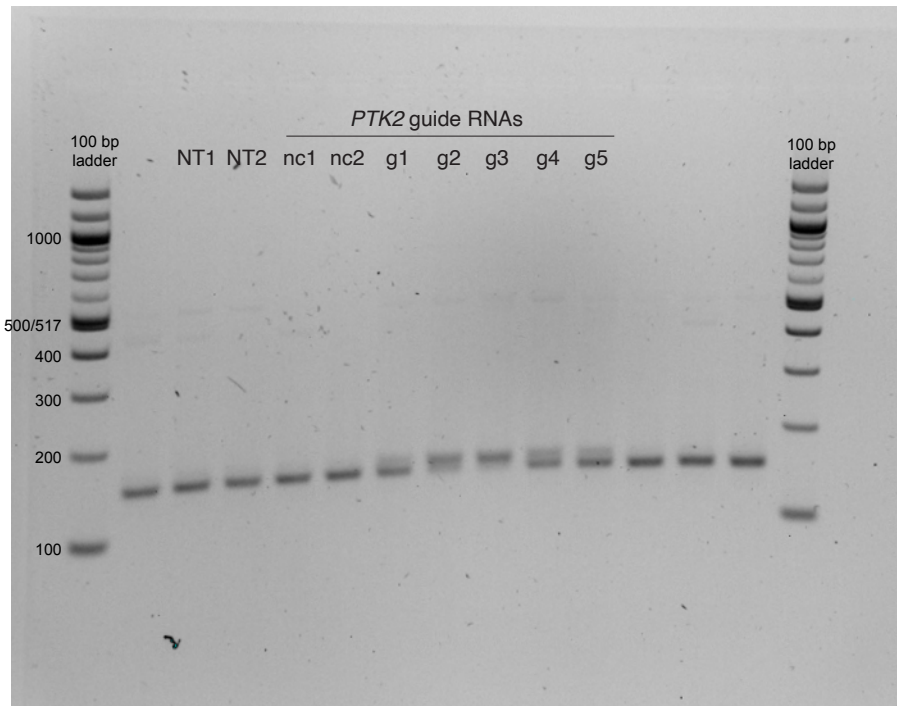

Supplement: fig5-data2 [file elife-106043-fig5-data2-v1.pdf]
